# Supplementary material for: Effectiveness of Omega-3 Fatty Acid Supplementation in Improving the Metabolic and Inflammatory Profiles of Mexican Adults Hospitalized with COVID-19
Source: MDPI journal article supplement (doi:10.3390/diseases12010028), 2024-01-17
Supplement: s1 [file s1]

## Supplementary material

Effectiveness of omega-3 fatty acid supplementation for improving the metabolic and inflammatory profiles of Mexican adults hospitalized with COVID-19. Diana Rodríguez-Vera et al.

**Table S1.** Demographic, comorbidity and severity (CO-RADS) of studied patients.

### Control group (n1)

| Patient            | Age  | Gender             | Overweight or obesity <sup>1</sup> | Diabetes  | Hypertension | Dyslipidemia <sup>2</sup> | CORADS <sup>3</sup> |
|--------------------|------|--------------------|------------------------------------|-----------|--------------|---------------------------|---------------------|
| 1                  | 52   | F                  | YES                                | YES       | YES          | YES                       | 5                   |
| 2                  | 65   | F                  | YES                                | NO        | NO           | YES                       | 5                   |
| 3                  | 49   | M                  | YES                                | NO        | NO           | NO                        | 5                   |
| 4                  | 53   | M                  | YES                                | NO        | NO           | NO                        | 5                   |
| 5                  | 31   | M                  | YES                                | NO        | NO           | YES                       | 5                   |
| 6                  | 79   | M                  | YES                                | YES       | NO           | YES                       | 5                   |
| 7                  | 35   | F                  | YES                                | YES       | NO           | YES                       | 5                   |
| 8                  | 34   | M                  | YES                                | NO        | YES          | YES                       | 5                   |
| 9                  | 56   | M                  | YES                                | YES       | NO           | YES                       | 5                   |
| 10                 | 26   | M                  | YES                                | YES       | NO           | YES                       | 5                   |
| 11                 | 59   | M                  | YES                                | YES       | NO           | NO                        | 5                   |
| 12                 | 65   | M                  | YES                                | YES       | NO           | NO                        | 5                   |
| 13                 | 42   | M                  | YES                                | NO        | YES          | YES                       | 5                   |
| 14                 | 42   | M                  | YES                                | YES       | NO           | YES                       | 5                   |
| 15                 | 28   | M                  | YES                                | YES       | YES          | YES                       | 5                   |
| 16                 | 50   | M                  | YES                                | YES       | NO           | YES                       | 5                   |
| 17                 | 69   | F                  | YES                                | YES       | YES          | YES                       | 5                   |
| 18                 | 48   | M                  | YES                                | YES       | NO           | YES                       | 5                   |
| 19                 | 60   | F                  | YES                                | YES       | NO           | NO                        | 5                   |
| 20                 | 31   | M                  | YES                                | YES       | NO           | YES                       | 5                   |
| 21                 | 75   | F                  | YES                                | NO        | NO           | YES                       | 5                   |
| 22                 | 69   | F                  | YES                                | NO        | NO           | NO                        | 5                   |
| 23                 | 81   | F                  | YES                                | YES       | NO           | YES                       | 5                   |
| Mean or percentage | 52.1 | M:65.2%<br>F:34.8% | YES: 100%                          | YES:65.2% | YES:21.7%    | YES:73.9%                 | 5                   |

### O3FA supplemented group (n2)

| Patient            | Age  | Gender             | Overweight or obesity <sup>1</sup> | Diabetes  | Hypertension | Dyslipidemia <sup>2</sup> | CORADS |
|--------------------|------|--------------------|------------------------------------|-----------|--------------|---------------------------|--------|
| 1                  | 52   | M                  | YES                                | NO        | NO           | YES                       | 5      |
| 2                  | 45   | M                  | YES                                | YES       | NO           | YES                       | 5      |
| 3                  | 61   | F                  | YES                                | YES       | YES          | YES                       | 5      |
| 4                  | 39   | F                  | YES                                | YES       | NO           | YES                       | 5      |
| 5                  | 26   | F                  | YES                                | NO        | NO           | NO                        | 5      |
| 6                  | 46   | M                  | YES                                | YES       | NO           | YES                       | 5      |
| 7                  | 25   | M                  | YES                                | NO        | NO           | YES                       | 5      |
| 8                  | 38   | F                  | YES                                | YES       | YES          | YES                       | 5      |
| 9                  | 47   | F                  | YES                                | YES       | NO           | YES                       | 5      |
| 10                 | 39   | M                  | YES                                | NO        | NO           | NO                        | 5      |
| 11                 | 53   | F                  | YES                                | YES       | NO           | YES                       | 5      |
| 12                 | 39   | M                  | YES                                | YES       | NO           | YES                       | 5      |
| 13                 | 59   | M                  | YES                                | YES       | NO           | NO                        | 5      |
| 14                 | 53   | M                  | YES                                | YES       | NO           | YES                       | 5      |
| 15                 | 82   | M                  | YES                                | YES       | NO           | NO                        | 5      |
| 16                 | 53   | F                  | YES                                | NO        | YES          | YES                       | 5      |
| 17                 | 73   | M                  | YES                                | NO        | NO           | YES                       | 5      |
| Mean or Percentage | 48.8 | M:64.7%<br>F:35.3% | YES:100%                           | YES:64.7% | YES:17.6%    | YES:76.5%                 | 5      |

<sup>1</sup> Body Mass Index  $\geq 25$

<sup>2</sup> Triglycerides  $\geq 150$  mg/dL, and/or Low-Density Lipoproteins  $\geq 190$  mg/dL.

<sup>3</sup> CO-RADS was declared as a 5 value as imageology approach was very high suspicion of COVID-19. However, a PCR(+)-Test was obtained in all cases (corresponding to CO-RADS 6 in the original work [42]).
